# Supplementary material
Source: PubMed Central journal article supplement (PMC5812007)
Supplement: NIHMS940107-supplement-Supplement_1.pdf [file NIHMS940107-supplement-Supplement_1.pdf]

**Figure S1. Related to Figure 2:** Sequences of essentializer degenerate library. Green = the antitoxin ORF and regulatory regions, Red = the toxin ORF and regulatory regions. Grey = the binding regions for *ci* and *Cro*, \* indicating it has been modified to increase binding efficiency according to previously published work (Sarai & Takeda, 1989; Takeda et al., 1989).

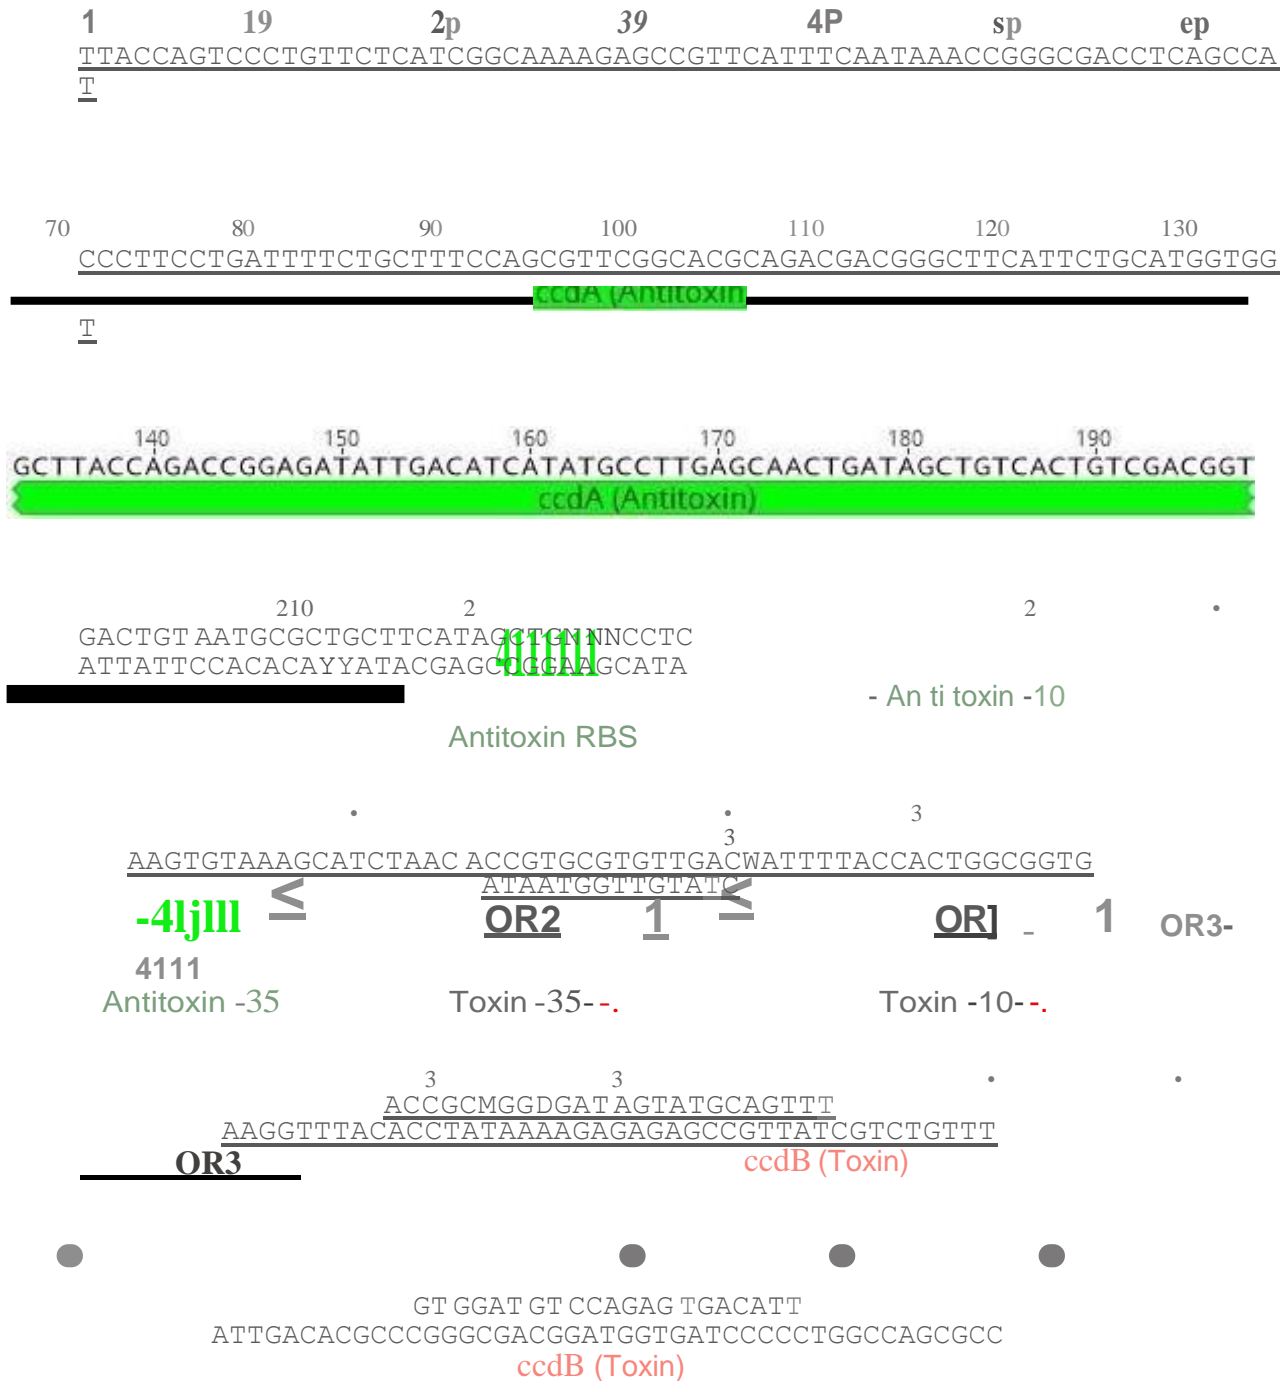

• • 5  
CGCCTACTGTCAGACAAAGTCTCCCGTGAGCTTT  
ACCCGGTGGTGCATGTCGGGGATGAAAGCTGG  
ccdB (Toxin)

5 5  
CGCATGATGACCACCGATATGGCCAGTGTGCCGGTCTCCGTTATCGGGG  
AAGAAGTGGCCGATCTC  
ccdB (Toxin)

600 610 620 630 640 651  
AGCCACCGCGAAAATGACATCAAAAACGCCATTAACCTGATGTTCTGGGGAATATAA  
ccdB (Toxin)
