# Supplementary material
Source: PubMed Central journal article supplement (PMC5812007)

**Figure S2. Related to Figure 4:** Fluorescence intensity for images in figure 4B. Images were partitioned into 5 section between streaked bacteria. A histogram of fluorescence intensity using arbitrary units is plotted for the strains containing different plasmids at a range of temperatures.

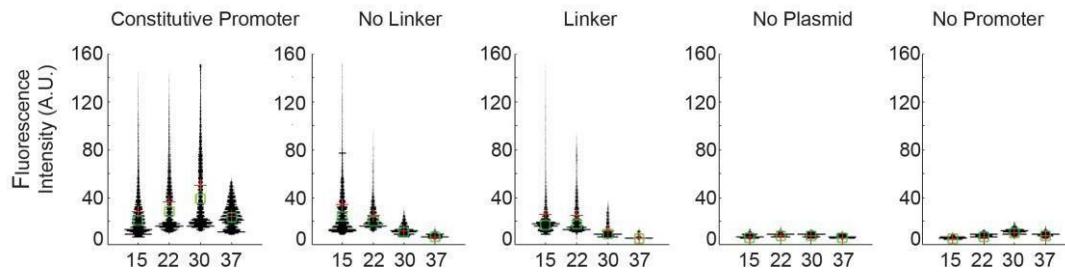

Supplement: NIHMS940107-supplement-Supplement_2.pdf [file NIHMS940107-supplement-Supplement_2.pdf]
