# Supplementary material
Source: PubMed Central journal article supplement (PMC5812007)

**Figure S3. Related to Figure 5:** Sequence of cryodeath degenerate library. Green = the antitoxin ORF and regulatory regions, Red = the toxin ORF and regulatory regions. Purple = toxin long 5' UTR. Blue = first 13 amino acids of *cspA* ORF, including the downstream box. Purple is the GGGGS linker that is present in all candidates except CD1 and CD11. Black annotations represent the regions that are deleted in CD01 and CD10.

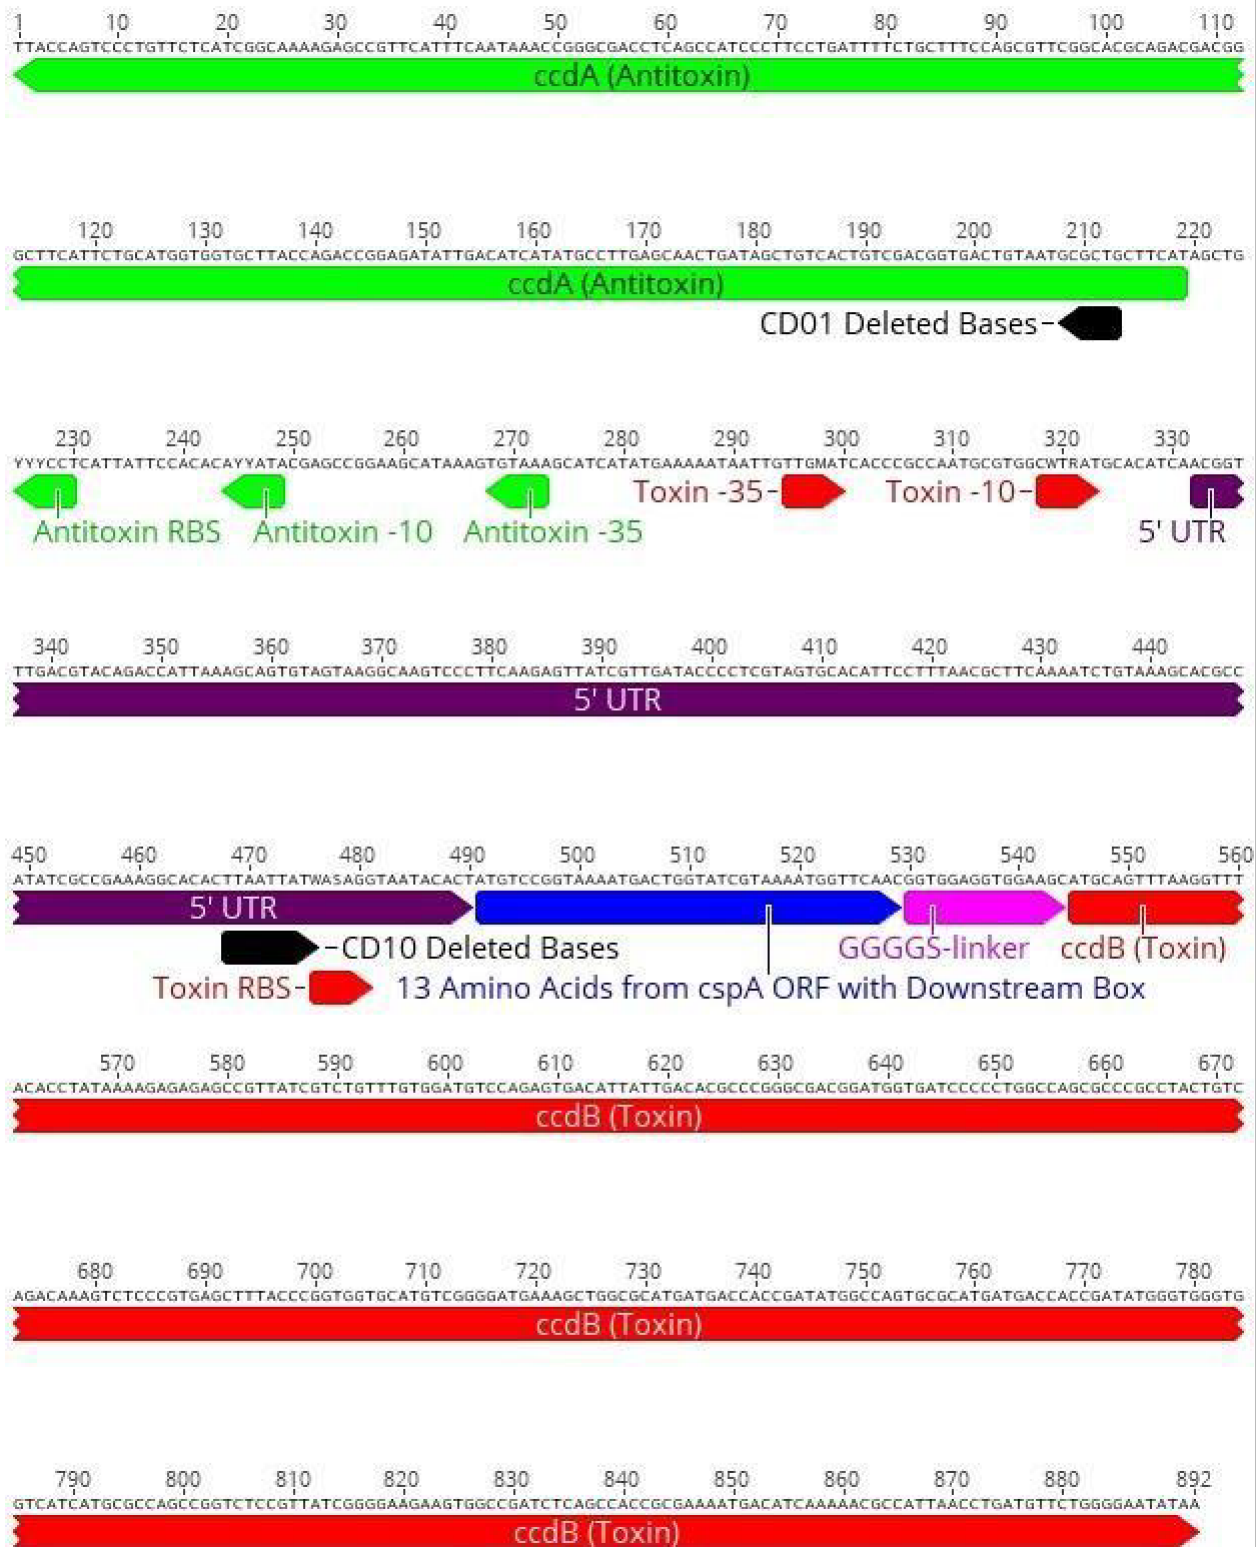

Supplement: NIHMS940107-supplement-Supplement_3.pdf [file NIHMS940107-supplement-Supplement_3.pdf]
