# Supplementary material
Source: PubMed Central journal article supplement (PMC5812007)

**Figure S4. Related to Figure 6:** Survival ratio of candidates CD01 and CD10 in Dh10 $\beta$  at 30 °C, room temperature (~22 °C), and 15 °C. Data points are from average of 3 technical repeats.

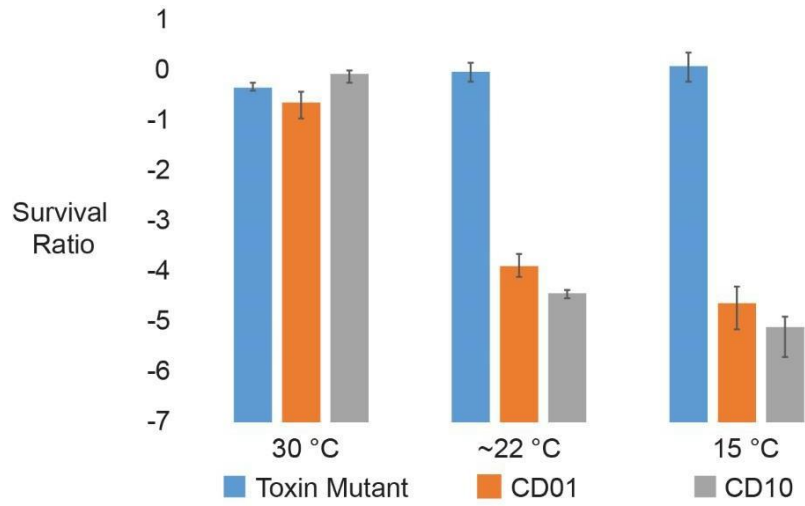

Supplement: NIHMS940107-supplement-Supplement_4.pdf [file NIHMS940107-supplement-Supplement_4.pdf]
