# Supplementary material
Source: PubMed Central journal article supplement (PMC5812007)
Supplement: NIHMS940107-supplement-Table_2.pdf [file NIHMS940107-supplement-Table_2.pdf]

**Table S2. Related to Figure 2 and 3:** complete sequence of regulatory region between the start codon of the toxin and the start codon of the antitoxin for all essentializer candidates analyzed. NL = non-lethal, TM = toxin mutant, EE01-EE11 = lethal candidates. EE12-EE40 = non-lethal candidates.

|      |                                                                                                                                                  |
|------|--------------------------------------------------------------------------------------------------------------------------------------------------|
| NL   | agctgTITcctcattattccacacaTCatcagagccggaagcataaaagtgtaaagcatctaacaccgtgCGTgttgacAatTTaccactggcggtgataatggttgatcaccgcAggTgatagt                    |
| TM   | agctgTITcctcattattccacacaTCatcagagccggaagcataaaagtgtaaagcatctaacaccgtgCGTgttgacAatTTaccactggcggtgataatggttgatcaccgcAggTgatagt                    |
| EE31 | agctgGGTccCattattccacacaTCatcagagccggaagcataaaagtgtaaagcatctaacaccgtgCGTgttgacAatTTaccactggcggtgataatggttgatcaccgcAggHgatagt                     |
| EE30 | agctgAATctcattattccacacaTTatcagagccggaagcataaaagtgtaaagcatctaacaccgtgCGTgttgacTatTTaccactggcggtgataatggttgatcaccgcAggTgatagt                     |
| EE29 | agctgAGTcctcattattccacacaTTatcagagccggaagcataaaagtgtaaagcatctaacaccgtgCGTgttgacAatTTaccactggcggtgataatggttgatcaccgcAggGgatagt                    |
| EE28 | agctgTITcctcattattccacacaTCatcagagccggaagcataaaagtgtaaagcatctaacaccgtgCGTgttgacAatTTaccactggcggtgataatggttgatcaccgcAggTgatagt                    |
| EE27 | agctgGTGcctcattattccacacaTCatcagagccggaagcataaaagtgtaaagcatctaacaccgtgCGTgttgacTatTTaccactggcggtgataatggttgatcaccgcAggCgatagt                    |
| EE26 | agctgGCcctcattattccacacaTTatcagagccggaagcataaaagtgtaaagcatctaacacc <u>tgCGTgttgacAatTTaccactggcggtgataatggttgatcaccgcCggGgatagt</u>              |
| EE25 | agctgCTCctcattattccacacaTCatcagagccggaagcataaaagtgtaaagcatctaacaccgtgCGTgttgacAatTTaccactggcggtgataatggttgatcaccgcAggGgatagt                     |
| EE24 | agctgGTcctcattattccacacaTCatcagagccggaagcataaaagtgtaaagcatctaacaccgtgCGTgttgacAatTTaccactggcggtgataatggttgatcaccgcCggTgatagt                     |
| EE23 | no Seq                                                                                                                                           |
| EE22 | agctgAGTcctcattattccacacaTCatcagagccggaagcataaaagtgtaaagcatctaacaccgtgCGTgttgacTatTTaccactggcggtgataatggttgatcaccgcCggGgatagt                    |
| EE21 | agctgTITcctcattattccacacaTTatcagagccggaagcataaaagtgtaaagcatctaacaccgtgCGTgttgacTatTTaccactggcggtgataatggttgatcaccgcAggHgatagt                    |
| EE20 | agctgAATcctcattattccacacaTCatcagagccggaagcataaaagtgtaaagcatctaacaccgtgCGTgttgacAatTTaccactggcggtgataatggttgatcaccgcCggGgatagt                    |
| EE19 | agctgATCctcattattccacacaTCatcagagccggaagcataaaagtgtaa <u>gc</u> atctaacaccgtgCGTgttgacAatTTaccactggcggtgataatggttgatcaccgcCggHgatagt             |
| EE18 | agctgGCcctcattattccacacaTCatcagagccggaagcataaaagtgtaaagcatctaacaccgtgCGTgttgacTatTTaccactggcggtgataatggttgatcaccgcAggGgatagt                     |
| EE17 | no Seq                                                                                                                                           |
| EE16 | agctgGTcctcattattccacacaTCatcagagccggaagcataaaagtgtaaagcatctaacaccgtgCGTgttgacAatTTaccactggcggtgataatggttgatcaccgcAggHgatagt                     |
| EE15 | agctgCTTcctcattattccacacaTatcagagccggaagcataaaagtgtaaagcatctaacaccgtgCGTgttgacTatTTaccactggcggtgataatggttgatcaccgcAggHgatagt                     |
| EE14 | agctgCTTcctcattattccacacaTCatcagagccggaagcataaaagtgtaaagcatctaacaccgtgc <u>tgttgacTatTTaccactggcggtgataatggttgatcaccgcAggGgatagt</u>             |
| EE13 | agctgTCcctcattattccacacaTCatcagagccggaagcataaaagtgtaaagc <u>ct</u> taaacaccgtgCGTgttgacAatTTaccactggcggtgataatggttgatcaccgcCggHgatagt            |
| EE12 | agctgGGcctcattattccacacaTCatcagagccggaagcataaaagt <u>taaa</u> gcatctaacaccgtgCGTgttgacTatTTaccactggcggtgataatggttgatcaccgcCggGgatagt             |
| EE11 | agctgGTcctcattattccacacaTCatcagagccggaagc <u>taaa</u> gtgtaaagcatctaacaccgtgCGTgttgacTatTTaccactggcggtgataatggttgatcaccgcCggHgatagt              |
| EE10 | agctgATGcctcattattccacacaTTatcagagccggaagc <u>taaa</u> gtgtaaagcatctaacaccgtgCGTgttgacAatTTaccactggcggtgataatggttgatcaccgcCggHgatagt             |
| EE09 | agctgGTGcctcattattccacacaTCatcagagccggaagcataaaagtgtaaagcatctaacaccgtgCGTgttgacAatTTaccactggcggtgataatggttgatcaccgcAggGgatagt                    |
| EE08 | agctgGGcctcattattccacacaTCatcagagccggaagcataaaagtgtaaagcatctaacaccgtgCGTgttgacAatTTaccactggcggtgataatggttgatcaccgcCggHgatagt                     |
| EE07 | agctgGCcctcattattccacacaTCatcagagccggaagcataaaagtgtaaagcatctaacacc <u>ct</u> taaacaccgtgCGTgttgacTatTTaccactggcggtgataatggttgatcaccgcCggHgatagt  |
| EE06 | agctgGAcctcattattccacacaTCatcagagccggaagcataaaagtgtaaagc <u>ct</u> taaacaccgtgCGTgttgacTatTTaccactggcggtgataatggttgatcaccgcCggHgatagt            |
| EE05 | agctgGTGcctcattattccacacaTTatcagagccggaagcataaaagtgtaaagcatctaacaccgtgCGTgttgacTatTTaccactggcggtgataatggttgatcaccgcAggHgatagt                    |
| EE04 | agctgGCcctcattattccacacaTCatcagagccggaagcataaaagtgtaaagcatctaacaccgtgCGTgttgacTatTTaccactggcggtgataatggttgatcaccgcAggHgatagt                     |
| EE03 | agctgAGGcctcattattccacacaTCatcagagccggaagcataaaagtgtaaagcatctaacaccgtgCGTgttgacTatTTaccactggcggtgataatggttgatcaccgcAggHgatagt                    |
| EE02 | agctgGAcctcattattccacacaTatcagagccggaagcataaaagt <u>taaa</u> gcatctaacaccgtgCGTgttgacTatTTaccactggcggtgataatggttgatcaccgcAggGgatagt              |
| EE01 | agctgTGAcctcattattccacacaTTatcagagccggaagcataaaagtgtaaagcatctaacacc <u>ct</u> taaacaccgtgCGTgttgacTatTTaccactggcggtgataatggttgatcaccgcAggHgatagt |

Table S2
