# Supplementary material
Source: PubMed Central journal article supplement (PMC5812007)
Supplement: NIHMS940107-supplement-Table_3.pdf [file NIHMS940107-supplement-Table_3.pdf]

**Table S3. Related to Figure 2:** Raw data from tests 1-4 of flowchart in Figure 2E.

| Candidate | Inhibited growth at 42°C (test 1) | No. transductants from MG1655 lysate into candidates (test 2) | No. transducatants from candidates lysate into MG1655 (test 3) | No. transducatants from candidates lysate into PAS132 (test 4) |
|-----------|-----------------------------------|---------------------------------------------------------------|----------------------------------------------------------------|----------------------------------------------------------------|
| EE01      | Yes                               | 0                                                             | 0                                                              | 7                                                              |
| EE02      | Yes                               | 0                                                             | 0                                                              | 6                                                              |
| EE03      | Yes                               | 0                                                             | 0                                                              | 7                                                              |
| EE04      | Yes                               | 0                                                             | 0                                                              | 2                                                              |
| EE05      | Yes                               | 0                                                             | 0                                                              | 12                                                             |
| EE06      | Yes                               | 0                                                             | 0                                                              | 10                                                             |
| EE07      | Yes                               | 0                                                             | 0                                                              | 10                                                             |
| EE08      | Yes                               | 0                                                             | 0                                                              | 11                                                             |
| EE09      | Yes                               | 0                                                             | 0                                                              | 16                                                             |
| EE10      | Yes                               | 0                                                             | 0                                                              | 7                                                              |
| EE11      | Yes                               | 0                                                             | 0                                                              | 3                                                              |
| EE12      | Yes                               | 22                                                            | 0                                                              | 8                                                              |
| EE13      | Yes                               | 1                                                             | 0                                                              | 10                                                             |
| EE14      | Yes                               | 0                                                             | 1                                                              | 10                                                             |
| EE15      | Yes                               | 8                                                             | 0                                                              | 10                                                             |
| EE16      | Yes                               | 13                                                            | 0                                                              | 5                                                              |
| EE17      | Yes                               | 20                                                            | 2                                                              | 9                                                              |
| EE18      | Yes                               | 0                                                             | 1                                                              | 19                                                             |
| EE19      | Yes                               | 216                                                           | 0                                                              | 6                                                              |
| EE20      | Yes                               | 7                                                             | 0                                                              | 7                                                              |
| EE21      | Yes                               | 97                                                            | 0                                                              | 5                                                              |
| EE22      | Yes                               | 13                                                            | 7                                                              | 13                                                             |
| EE23      | Yes                               | 10                                                            | 0                                                              | 4                                                              |
| EE24      | No                                | 6                                                             | 1                                                              | 3                                                              |
| EE25      | No                                | na                                                            | na                                                             | na                                                             |
| EE26      | No                                | 30                                                            | 0                                                              | 5                                                              |
| EE27      | No                                | na                                                            | na                                                             | na                                                             |
| EE28      | No                                | 12                                                            | 7                                                              | 11                                                             |
| EE29      | No                                | na                                                            | na                                                             | na                                                             |
| EE30      | No                                | 11                                                            | 25                                                             | 14                                                             |
| EE31      | No                                | 0                                                             | 8                                                              | 7                                                              |
| NL        | No                                | 142                                                           | 5                                                              | 13                                                             |
| TM        | No                                | 48                                                            | 16                                                             | 10                                                             |

**Table S3**
