# Supplementary material
Source: PubMed Central journal article supplement (PMC5812007)
Supplement: NIHMS940107-supplement-Table_4.pdf [file NIHMS940107-supplement-Table_4.pdf]

**Table S4. Related to Figure 3:** Results of growing toxin only versions of EE10 and EE11 in TB10 and PAS132 backgrounds. Failure to grow in TB10 at 42°C implies a functional essentializer element. Capacity to select for the memory element was determined using the assay outlined in Figure 3A.

|                   | Failed to grow at 42°C in TB10 | Fully Selected for the Presence of the Memory Element in PAS132 |
|-------------------|--------------------------------|-----------------------------------------------------------------|
| EE10 toxin only 1 | Yes                            | No                                                              |
| EE10 toxin only 2 | Yes                            | Yes                                                             |
| EE10 toxin only 3 | No                             | No                                                              |
| EE10 toxin only 4 | No                             | No                                                              |
| EE10 toxin only 5 | Yes                            | No                                                              |
| EE10 toxin only 6 | Yes                            | Yes                                                             |
| EE10 toxin only 7 | Yes                            | Yes                                                             |
| EE10 toxin only 8 | Yes                            | Yes                                                             |
| EE11 toxin only 1 | Yes                            | Yes                                                             |
| EE11 toxin only 2 | Yes                            | Yes                                                             |
| EE11 toxin only 3 | Yes                            | Yes                                                             |
| EE11 toxin only 4 | No                             | No                                                              |
| EE11 toxin only 5 | Yes                            | Yes                                                             |
| EE11 toxin only 6 | No                             | No                                                              |
| EE11 toxin only 7 | Yes                            | Yes                                                             |

**Table S4**
