# Supplementary material
Source: PubMed Central journal article supplement (PMC5812007)
Supplement: NIHMS940107-supplement-Table_5.pdf [file NIHMS940107-supplement-Table_5.pdf]

**Table S5. Related to Figure 5 and 6:** Complete sequence of regulatory region minus the 5' UTR between the start codon of the toxin and the start codon of the antitoxin for all cryodeath candidates analyzed. NL = candidate used as non-lethal control, CD01-CD10 = lethal candidates. CD11- CD26 = non-lethal candidates. Capitalized bases are where degeneracy was introduced. \*indicates the 5'UTR of CD10 is modified with a 10 bp deletion. Final column is sequence of 5' UTR. Although technically not part of the 5' UTR, bases -1 to -8 of the  $P_{cspA}$  are also grouped into this sequence for space considerations.

|      |      |      |      |      |      |      |      |      |      |      |      |      |      |      |      |      |      |      |      |      |      |      |      |      |    |        |
|------|------|------|------|------|------|------|------|------|------|------|------|------|------|------|------|------|------|------|------|------|------|------|------|------|----|--------|
| CD01 | CD02 | CD03 | CD04 | CD05 | CD06 | CD07 | CD08 | CD09 | CD10 | CD11 | CD13 | CD14 | CD15 | CD16 | CD17 | CD18 | CD19 | CD20 | CD21 | CD22 | CD23 | CD24 | CD25 | CD26 | NL | 5' UTR |
|------|------|------|------|------|------|------|------|------|------|------|------|------|------|------|------|------|------|------|------|------|------|------|------|------|----|--------|
