# Supplementary material
Source: PubMed Central journal article supplement (PMC5812007)
Supplement: NIHMS940107-supplement-Table_6.pdf [file NIHMS940107-supplement-Table_6.pdf]

**Table S6. Related to Figure 3 and Figure 6:** Whole genome sequencing of the non-temperature sensitive CD08 strains and CD10 strains that grew at 22 °C. For CD08, mutations were identified in only one of two strains sequenced. Two mutations were identified in this strain. For CD10 strains, mutations were identified in 3 out of 5 strains sequenced.

| CD08 Non Temperature Sensitive Strains |                         | Gene | Alteration      |
|----------------------------------------|-------------------------|------|-----------------|
| 1                                      |                         |      |                 |
| 2                                      | 5' UTR of <i>CspA</i>   |      | G→T             |
| 2                                      | <i>gtrS</i>             |      | 529 bp deletion |
| CD10 Escapees                          |                         | Gene | Alteration      |
| 1                                      |                         |      |                 |
| 2                                      | 5' UTR of <i>CcdB</i>   |      | 215 → 64 bp     |
| 3                                      | <i>yedN</i>             |      | +4 bp           |
| 4                                      | promoter of <i>ccdB</i> |      | +9 bp           |
| 5                                      |                         |      |                 |

**Table S6**
