# Supplementary material
Source: PubMed Central journal article supplement (PMC5812007)
Supplement: NIHMS940107-supplement-Table_8.pdf [file NIHMS940107-supplement-Table_8.pdf]

**Table S8. Related to Figure 3 and Figure 6:** Sequences of regulatory region and ORF of *ccdB* CD10 toxin only constructs: Spaces indicate where a deletion has occurred compared to parental CD10. All seven CD10 toxin only constructs have frame shift mutations within the ORF of *ccdB*.
